# Supplementary material for: Nitrogen fixation on a single Mo atom embedded stanene monolayer: a computational study
Source: Royal Society of Chemistry journal article supplement (doi:10.1039/d0cp01963a), 2020-01-01
Supplement: d0cp01963a1.pdf [file d0cp01963a1.pdf]

Nitrogen Fixation on defected Stanene Monolayer Embedded by single  
Mo atom: A Computational Study

Yao Tan, Ying Xu\*

School of Physics and Electronic Science, Hunan University of Science and  
Technology, Xiangtan 411201, China

---

\* Corresponding author,

Email address: [yxu@hnust.edu.cn](mailto:yxu@hnust.edu.cn) (Ying Xu)

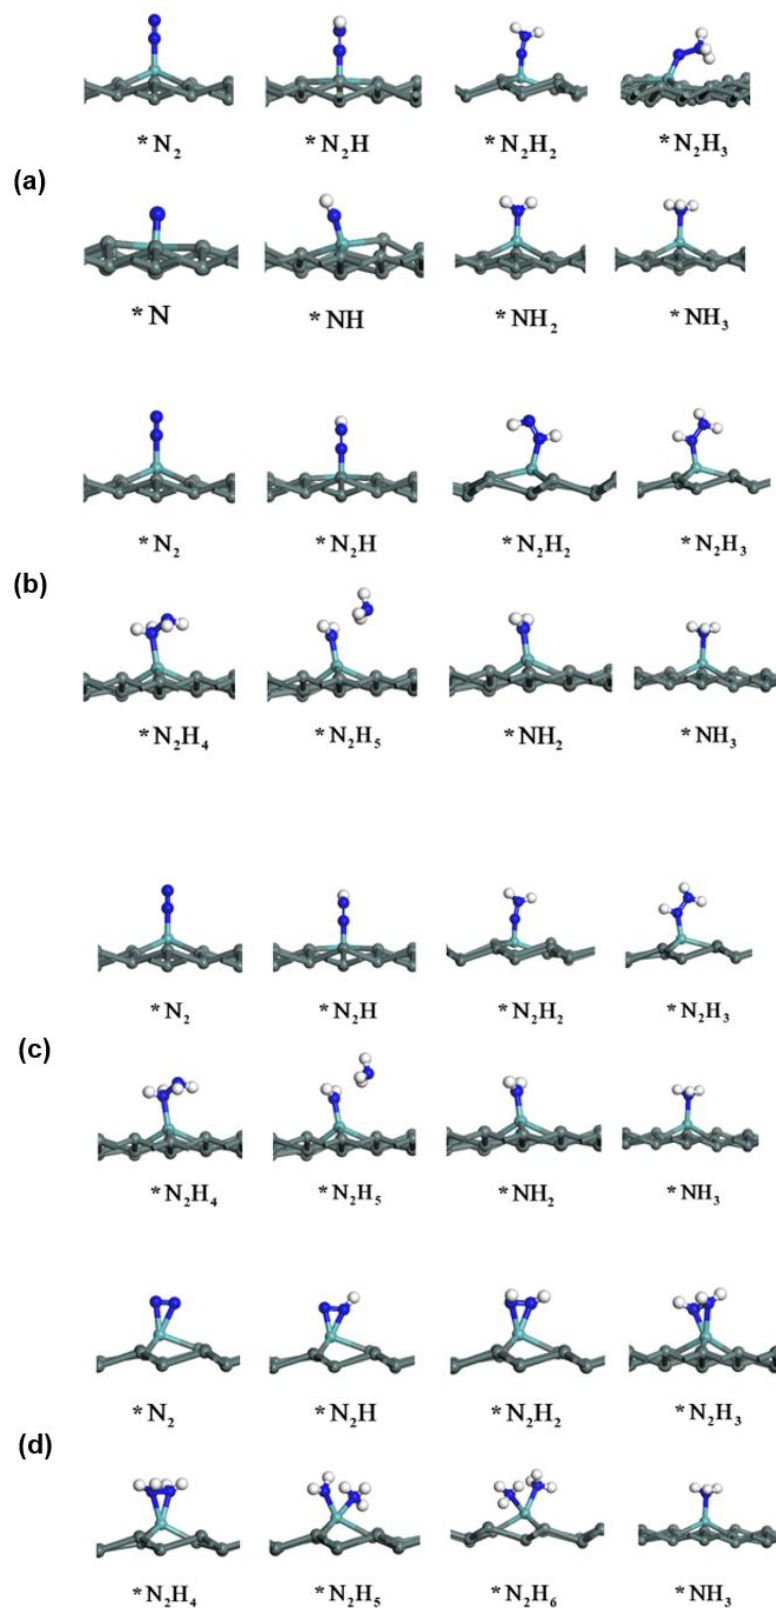

**Figure S1.** Optimized structures of the reaction intermediates through (a) distal, (b) alternating, (c) mixed, and (d) enzymatic pathways on the Mo/Stanene sheet.

Table S1. Calculated binding energies values of different transition metal atoms .

| Transition metal atom | <i>Adsorption energy(eV)</i> |
|-----------------------|------------------------------|
| <i>Ti</i>             | - 4.57                       |
| <i>V</i>              | -5.88                        |
| <i>Fe</i>             | -3.67                        |
| <i>Mn</i>             | -2.89                        |
| <i>Ru</i>             | -6.58                        |
| <i>Rh</i>             | -5.86                        |
| <i>Co</i>             | -4.61                        |
| <i>Ni</i>             | -5.04                        |
| <i>Mo</i>             | -4.06                        |

Table S2. Calculated ZPE and TS values of different species for end-on adsorption configuration, where the label \* denotes the status of adsorption.

| <i>Adsorbed species</i> | $E_{zpe}(eV)$ | $TS(eV)$ |
|-------------------------|---------------|----------|
| $N_2$                   | 0.15          | 0.59     |
| * $N_2$                 | 0.20          | 0.17     |
| * $N$                   | 0.08          | 0.07     |
| * $NH$                  | 0.35          | 0.10     |
| * $NH_2$                | 0.64          | 0.15     |
| * $NH_3$                | 1.02          | 0.16     |
| * $NNH$                 | 0.47          | 0.12     |
| * $NNH_2$               | 0.80          | 0.20     |
| * $NNH_3$               | 1.12          | 0.19     |
| * $NHNNH$               | 0.81          | 0.18     |
| * $NHNNH_2$             | 1.13          | 0.21     |
| * $NH_2NH_2$            | 1.48          | 0.24     |
| $NH_3$                  | 0.91          | 0.60     |
| $H_2$                   | 0.27          | 0.40     |

Table S3. Calculated ZPE and TS values of different species for side-on adsorption configuration, where the label \* denotes the status of adsorption.

| <i>Adsorbed species</i>             | <i>E<sub>zpe</sub>(eV)</i> | <i>TS(eV)</i> |
|-------------------------------------|----------------------------|---------------|
| <i>N<sub>2</sub></i>                | 0.15                       | 0.59          |
| * <i>N<sub>2</sub></i>              | 0.18                       | 0.16          |
| * <i>N<sub>2</sub>H</i>             | 0.47                       | 0.15          |
| * <i>N<sub>2</sub>H<sub>2</sub></i> | 0.78                       | 0.17          |
| * <i>N<sub>2</sub>H<sub>3</sub></i> | 1.15                       | 0.18          |
| * <i>N<sub>2</sub>H<sub>4</sub></i> | 1.47                       | 0.24          |
| * <i>N<sub>2</sub>H<sub>5</sub></i> | 1.68                       | 0.26          |
| * <i>N<sub>2</sub>H<sub>6</sub></i> | 2.03                       | 0.31          |
| * <i>NH<sub>3</sub></i>             | 1.02                       | 0.16          |
| <i>NH<sub>3</sub></i>               | 0.91                       | 0.60          |
| <i>H<sub>2</sub></i>                | 0.27                       | 0.40          |
